# Supplementary material for: Functional implications of microbial and viral gut metagenome changes in early stage L-DOPA-naïve Parkinson’s disease patients
Source: PubMed Central journal article supplement (PMC5408370; doi:10.1186/s13073-017-0428-y), 2017-04-28
Supplement: 13073_2017_428_MOESM1_ESM.pdf [file 13073_2017_428_MOESM1_ESM.pdf]

**Modified version of the Gastrointestinal Symptoms Rating Scale (GSRS) according to Svedlund et al. 1988**

**Item 6: Borborygmus.** Representing reports of abdominal rumbling. Rate according to intensity, frequency, duration, and impact on social performance.

- 0 No or transient borborygmus
- 1 Occasional troublesome borborygmus of short duration
- 2 Frequent and prolonged episodes which can be mastered by moving without impairing social performance
- 3 Continuous borborygmus severely interfering with social performance

**Item 7: Abdominal distension.** Representing bloating with abdominal gas. Rate according to intensity, frequency, duration and impact on social performance.

- 0 No or transient distension
- 1 Occasional discomfort of short duration
- 2 Frequent and prolonged episodes which can be mastered by adjusting the clothing
- 3 Continuous discomfort severely interfering with social performance

**Item 9: Increased flatus:** Representing reports of increased wind. Rate according to intensity, frequency, duration and impact on social performance.

- 0 No increased flatus
- 1 Occasional discomfort of short duration
- 2 Frequent and prolonged episodes interfering with some social performance
- 3 Frequent episodes seriously interfering with social performance

**Item 10: Decreased passage of stools.** Representing reported reduced defecation. Rate according to frequency. Distinguish from consistency.

- 0 Once a day
- 1 Every third day
- 2 Every fifth day
- 3 Every seventh day or less frequently

**Item 11: Increased passage of stools.** Representing reported increased defecation. Rate according to frequency. Distinguish from consistency.

- 0 Once a day
- 1 Three times a day
- 2 Five times a day
- 3 Seven times a day or more frequently

**Item 12: Loose stools.** Representing reported loose stools. Rate according to consistency independent of frequency and feelings of incomplete evacuation.

- 0 Normal consistency
- 1 Somewhat loose
- 2 Runny
- 3 Watery

**Item 13: Hard stools.** Representing reported hard stools. Rate according to consistency independent of frequency and feelings of incomplete evacuation.

- 0 Normal consistency
- 1 Somewhat hard
- 2 Hard
- 3 Hard and fragmented, sometimes in combination with diarrhea

**Item 14.: Urgent need for defecation.** Representing reports of urgent need for defecation, feelings of incomplete control, and inability to control defecation. Rate according to intensity, frequency, duration and impact on social performance.

- 0 Normal control
- 1 Occasional feelings of urgent need for defecation
- 2 Frequent feelings of urgent need for defecation with sudden need for a toilet interfering with social performance
- 3 Inability to control defecation

**Item 15: Feeling of incomplete evacuation.** Representing reports of defecation with straining and a feeling of incomplete evacuation of stools. Rate according to intensity and frequency.

0 Feeling of complete evacuation without straining

1 Defecation somewhat difficult; occasional feelings of incomplete evacuation

2 Defecation definitely difficult; often feelings of incomplete evacuation

3 Defecation extremely difficult; regular feelings of incomplete evacuation
