# Supplementary material for: Functional implications of microbial and viral gut metagenome changes in early stage L-DOPA-naïve Parkinson’s disease patients
Source: PubMed Central journal article supplement (PMC5408370; doi:10.1186/s13073-017-0428-y), 2017-04-28

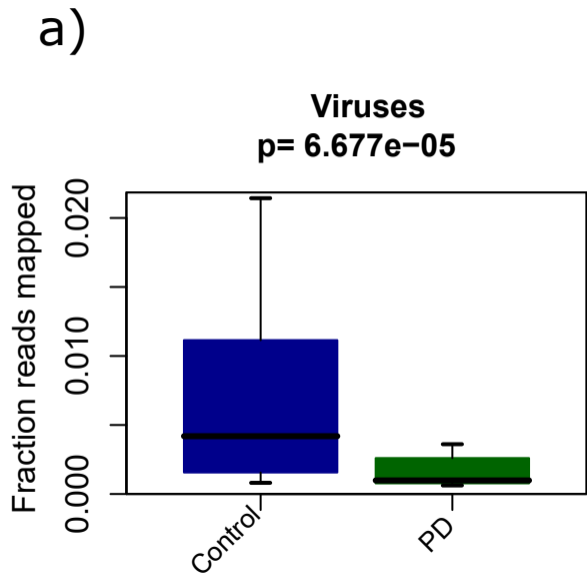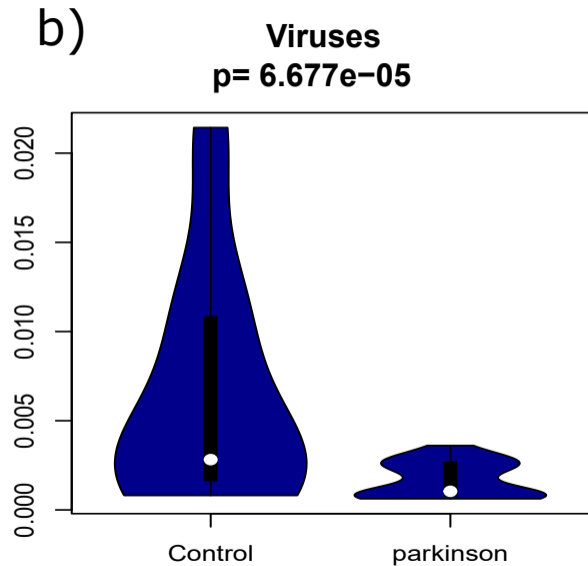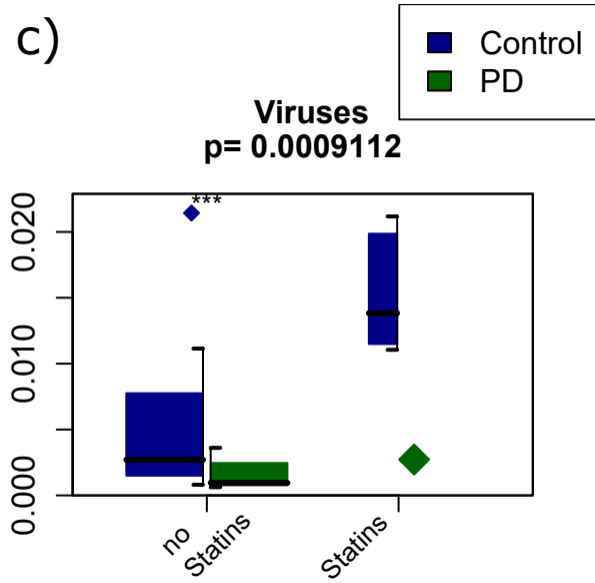

Supplement: 13073_2017_428_MOESM14_ESM.pdf [file 13073_2017_428_MOESM14_ESM.pdf]
